# Supplementary material for: CX3CR1-CX3CL1-dependent cell-to-cell Japanese encephalitis virus transmission by human microglial cells
Source: PubMed Central journal article supplement (PMC6423114; doi:10.1038/s41598-019-41302-1), 2019-03-18
Supplement: 41598_2019_41302_MOESM1_ESM.pdf [file 41598_2019_41302_MOESM1_ESM.pdf]

## **CX<sub>3</sub>CR1-CX<sub>3</sub>CL1-dependent cell-to-cell Japanese encephalitis virus transmission by human microglial cells**

Nils Lannes<sup>1\*</sup>, Obdullio Garcia-Nicolas<sup>2,3</sup>, Thomas Démoulin<sup>2,3</sup>, Artur Summerfield<sup>2,3</sup> and Luis Filgueira<sup>1</sup>

<sup>1</sup> Unit of Anatomy, Department of Medicine, University of Fribourg, Route Albert-Gockel 1, Fribourg, Switzerland

<sup>2</sup> Institute of Virology and Immunology, Sensemattstrasse 293, Mithelhäusern, Switzerland

<sup>3</sup> Department of Infectious Diseases and Pathobiology, Vetsuisse Faculty, University of Bern, Langgassstrasse 122, Bern, Switzerland

Authors' e-mail: NL: [nils.lannes@unifr.ch](mailto:nils.lannes@unifr.ch); OGN: [obdullio.garcia-nicolas@ivi.admin.ch](mailto:obdullio.garcia-nicolas@ivi.admin.ch); TD: [thomas.demoulin@ivi.admin.ch](mailto:thomas.demoulin@ivi.admin.ch); AS: [artur.summerfield@ivi.admin.ch](mailto:artur.summerfield@ivi.admin.ch); LF: [luis.filgueira@unifr.ch](mailto:luis.filgueira@unifr.ch)

Corresponding author: Nils Lannes; e-mail: [nils.lannes@unifr.ch](mailto:nils.lannes@unifr.ch)

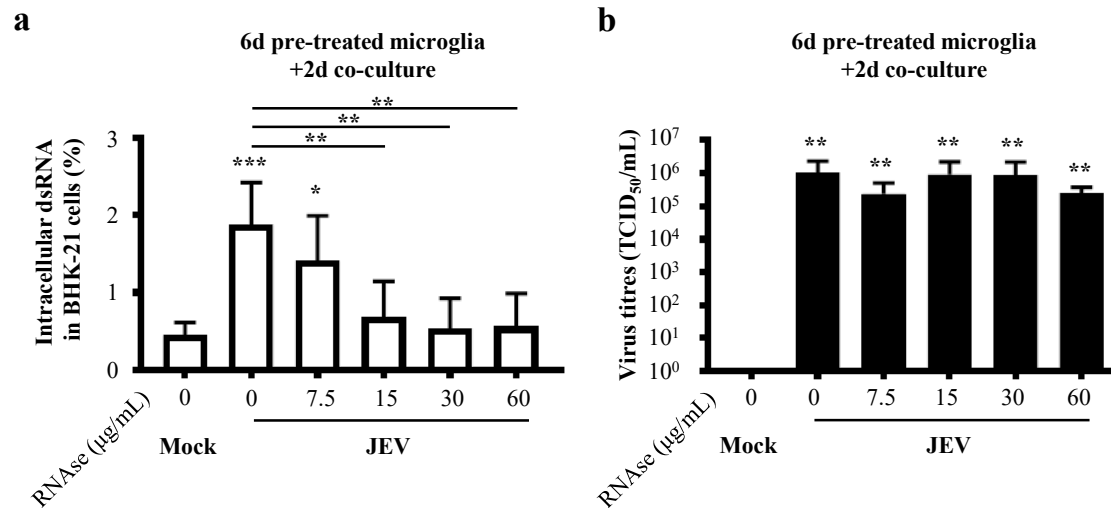

**Supplementary Figure 1. Dose dependent impact of RNase A on virus transmission and recovery.** Human microglia were pre-treated with Mock and JEV (Nakayama isolate used at an MOI of 10 TCID<sub>50</sub>/cell) at 37°C for 6 days. Cells were then washed with cold PBS and subsequently co-cultured with BHK-21 cells for 2 additional days in the presence of 1:100 Ctrl serum and indicated concentrations of RNase A. **(a)** Histogram bars representing frequencies of BHK-21 cells expressing dsRNA identified as in Figure 4a upon flow cytometry analysis. The bar represents the mean value; the error bars the standard deviation. **(b)** Histogram bars representing virus titres in supernatants. The bar represents the mean value; the error bars the standard deviation. Data are of 2 independent experiments with each condition performed in duplicate or triplicate cultures. Asterisks on top of a condition show significant differences compared to mock; asterisks on black line show significant differences between the indicated conditions. Statistics are calculated with **(a)** the t-test or **(b)** the Mann-Whitney test (\* : p<0.05; \*\* : p<0.01; \*\*\* : p<0.001; \*\*\*\* : p<0.0001).

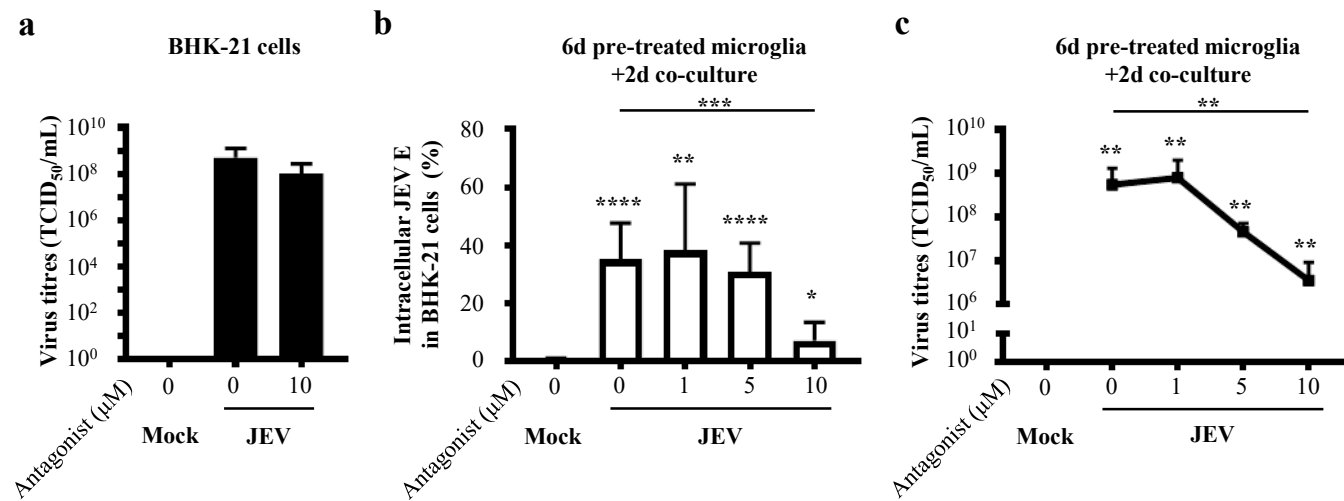

**Supplementary Figure 2. Dose dependent impact of CX<sub>3</sub>CR1 antagonist on viral propagation in BHK-21, virus transmission and recovery.** (a) BHK-21 were treated with Mock and JEV (Nakayama isolate used at an MOI of 0.01 TCID<sub>50</sub>/cell) at 37°C for 2 days. Histogram bars representing virus titres in supernatants. The bar represents the mean value; the error bars the standard deviation. Data are of 3 independent experiments. (b, c) Human microglia were pre-treated with Mock and JEV (Nakayama isolate used at an MOI of 10 TCID<sub>50</sub>/cell) at 37°C for 6 days. Cells were then washed with cold PBS and subsequently co-cultured with BHK-21 cells for 2 additional days in the presence of 1:100 Ctrl serum and indicated concentrations of CX<sub>3</sub>CR1 antagonist. (b) Histogram bars representing frequencies of BHK-21 cells expressing JEV E identified as in Figure 4a upon flow cytometry analysis. The bar represents the mean value; the error bars the standard deviation. (c) Curve lines representing virus titres in supernatants. The symbol represents the mean value; the error bars the standard deviation. Data are of 3 independent experiments with each condition performed in duplicate or triplicate cultures. Asterisks on top of a condition show significant differences compared to mock; asterisks on black line show significant differences between the indicated conditions. Statistics are calculated with (b) the t-test or (a, c) the Mann-Whitney test (\* : p<0.05; \*\* : p<0.01; \*\*\* : p<0.001; \*\*\*\* : p<0.0001).

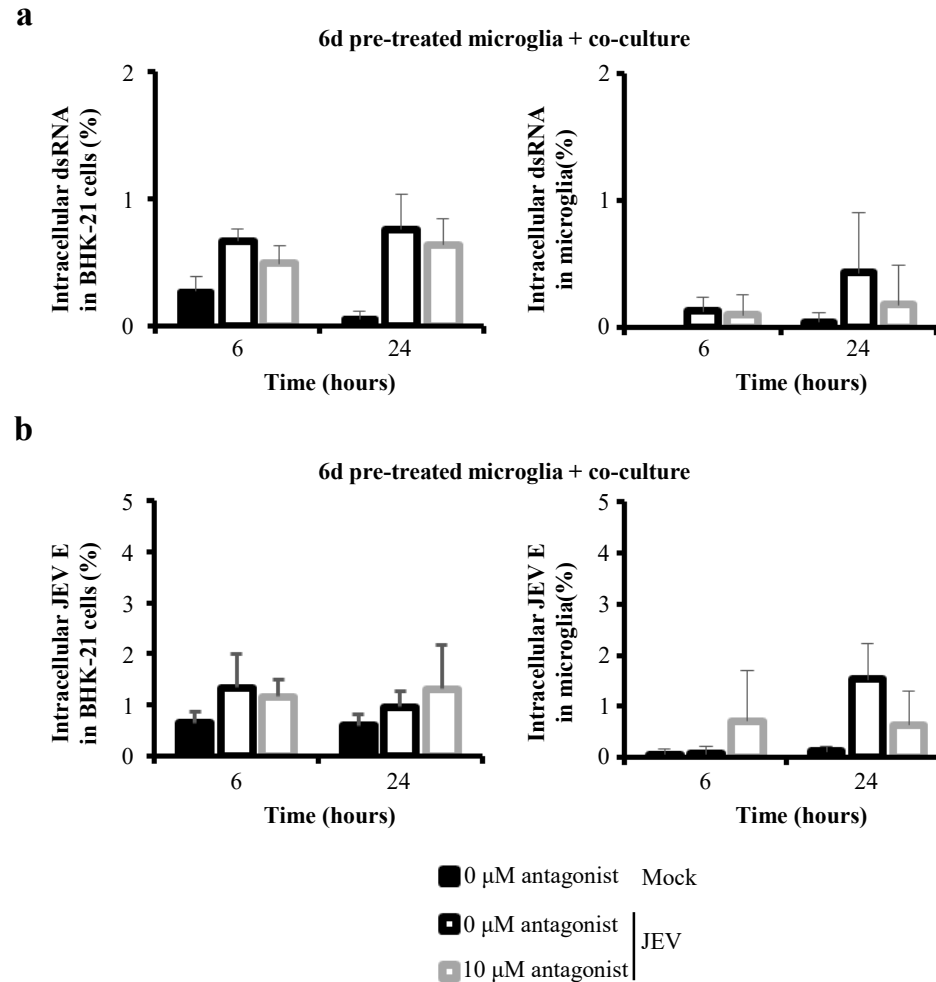

**Supplementary Figure 3. Impact of CX<sub>3</sub>CR1 antagonist on dsRNA and JEV E expression in BHK-21 cells and microglia at early time periods of incubation.** Human microglia were pre-treated with Mock and JEV (Nakayama isolate used at an MOI of 10 TCID<sub>50</sub>/cell) at 37°C for 6 days. Cells were then washed with cold PBS and subsequently co-cultured with BHK-21 cells for indicated time period in the presence of 1:100 Ctrl serum and indicated concentrations of CX<sub>3</sub>CR1 antagonist. Cells were analysed by flow cytometry. Histogram bars representing frequencies of BHK-21 cells and microglia expressing (a) dsRNA and (b) JEV E identified as in Figure 4a. Data represent one experiments done in triplicate of cultures.

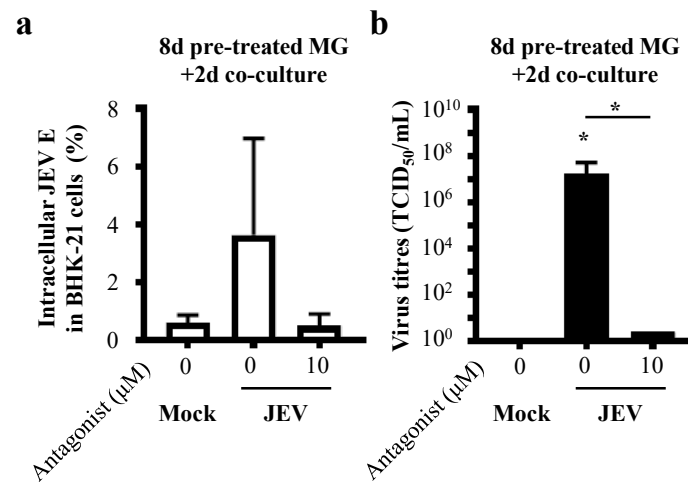

**Supplementary Figure 4. Impact of CX<sub>3</sub>CR1 antagonist on virus transmission and recovery by 8d pre-treated human microglia.** Human microglia were pre-treated with Mock and JEV (Nakayama isolate used at an MOI of 10 TCID<sub>50</sub>/cell) at 37°C for 8 days. Cells were then washed with cold PBS and subsequently co-cultured with BHK-21 cells for 2 additional days in the presence of 1:100 Ctrl serum and indicated concentrations of CX<sub>3</sub>CR1 antagonist. **(a)** Histogram bars representing frequencies of BHK-21 cells expressing JEV E identified as in Figure 4a upon flow cytometry analysis. **(b)** Histogram bars representing virus titres in supernatants. The bar represents the mean value; the error bars the standard deviation. Data are of 2 independent experiments with each condition performed in duplicate or triplicate cultures. Asterisks on top of plot show significant differences compared to mock; asterisks on black line show significant differences between the indicated conditions. Statistics are calculated with **(a)** the t-test or **(b)** the Mann-Whitney test (\* : p<0.05; \*\* : p<0.01; \*\*\* : p<0.001; \*\*\*\* : p<0.0001).
